# Supplementary material for: Periconceptional Maternal Protein Intake from Animal and Plant Sources and the Impact on Early and Late Prenatal Growth and Birthweight: The Rotterdam Periconceptional Cohort
Source: MDPI journal article supplement (doi:10.3390/nu14245309), 2022-12-14
Supplement: s1 [file s1]

**Table S1.** Baseline characteristics of the included and excluded pregnancies.

| <b>Maternal characteristics</b>      | <b>Total study population<br/>(n = 501)</b> | <b>Excluded pregnancies<br/>(n = 864)</b> |
|--------------------------------------|---------------------------------------------|-------------------------------------------|
| Age at conception (years)            |                                             |                                           |
| Mean (SD)                            | 32.7 (4.3)                                  | 32.0 (4.8)                                |
| Missing                              | 0                                           | 158                                       |
| Geographical background              |                                             |                                           |
| Non-western                          | 50 (10.4%)                                  | 104 (16.6%)                               |
| Western                              | 431 (89.6%)                                 | 523 (83.4%)                               |
| Missing                              | 20                                          | 237                                       |
| Educational level                    |                                             |                                           |
| Low                                  | 33 (6.9%)                                   | 50 (8.0%)                                 |
| Medium                               | 159 (33.0%)                                 | 225 (35.9%)                               |
| High                                 | 290 (60.2%)                                 | 352 (56.1%)                               |
| Missing                              | 19                                          | 237                                       |
| Parity                               |                                             |                                           |
| Nulliparous                          | 205 (42.4%)                                 | 238 (38.0%)                               |
| Multiparous                          | 278 (57.6%)                                 | 389 (62.0%)                               |
| Missing                              | 18                                          | 237                                       |
| Conception mode                      |                                             |                                           |
| IVF/ICSI                             | 271 (54.1%)                                 | 166 (35.7%)                               |
| Natural                              | 230 (45.9%)                                 | 299 (64.3%)                               |
| Missing                              | 0                                           | 399                                       |
| Body Mass Index (kg/m <sup>2</sup> ) |                                             |                                           |
| Mean (SD)                            | 24.7 (4.1)                                  | 27.1 (5.5)                                |
| Missing                              | 0                                           | 265                                       |
| Folic acid supplement use            |                                             |                                           |
| Inadequate                           | 62 (12.9%)                                  | 154 (24.7%)                               |
| Adequate                             | 420 (87.1%)                                 | 469 (75.3%)                               |
| Missing                              | 19                                          | 241                                       |
| Smoking                              |                                             |                                           |
| Yes                                  | 66 (13.7%)                                  | 90 (14.4%)                                |
| No                                   | 417 (86.3%)                                 | 534 (85.6%)                               |
| Missing                              | 18                                          | 240                                       |
| Alcohol                              |                                             |                                           |
| Yes                                  | 139 (28.8%)                                 | 184 (29.5%)                               |
| No                                   | 344 (71.2%)                                 | 440 (70.5%)                               |
| Missing                              | 18                                          | 240                                       |
| Drugs                                |                                             |                                           |
| Yes                                  | 10 (2.1%)                                   | 13 (2.1%)                                 |
| No                                   | 473 (97.9%)                                 | 611 (97.9%)                               |
| Missing                              | 18                                          | 240                                       |
| Energy intake (kcal/day)             |                                             |                                           |
| Mean (SD)                            | 1940 (562)                                  | 1590 (678)                                |
| Missing                              | 0                                           | 386                                       |

Continuous data are presented as means with standard deviation (SD) and categorical data as numbers of individuals with percentages.
